# Supplementary material
Source: PubMed Central journal article supplement (PMC4136109)
Supplement: AEM.01620-14_zam999105614so1.pdf [file AEM.01620-14_zam999105614so1.pdf]

1 **Supporting Information**

2

3 **A genetically engineered *Pseudomonas putida* for**

4 **1,2,3-trichloropropane bioremediation**

5

6 Ghufrana Samin<sup>1,3</sup>, Martina Pavlova<sup>2,§</sup>, M. Irfan Arif<sup>1</sup>, Christiaan P. Postema<sup>1</sup>, Jiri Damborsky<sup>2</sup>,  
7 Dick B. Janssen<sup>1#</sup>

8 <sup>1</sup> Department of Biochemistry, Groningen Biomolecular Sciences and Biotechnology Institute,  
9 University of Groningen.

10 <sup>2</sup> Loschmidt Laboratories and Research Centre for Toxic Compounds in the Environment,  
11 Faculty of Science, Masaryk University, Brno, Czech Republic

12 <sup>3</sup> Department of Chemistry, University of Engineering and Technology Lahore, Faisalabad  
13 Campus, Pakistan.

14

15

16

17

18

19

20

21

22

23

24

---

<sup>§</sup> Current address: Favea, Bozeny Nemcové 580, 742 21 Koprivnice, Czech Republic

<sup>#</sup> For correspondence: E-mail: d.b.janssen@rug.nl; Tel: (+31) 50-3634008; Fax: (+31) 50-3634165;  
Address: Nijenborgh 4, 9747 AG Groningen, The Netherlands.

25  
26  
27  
28  
29

Figures

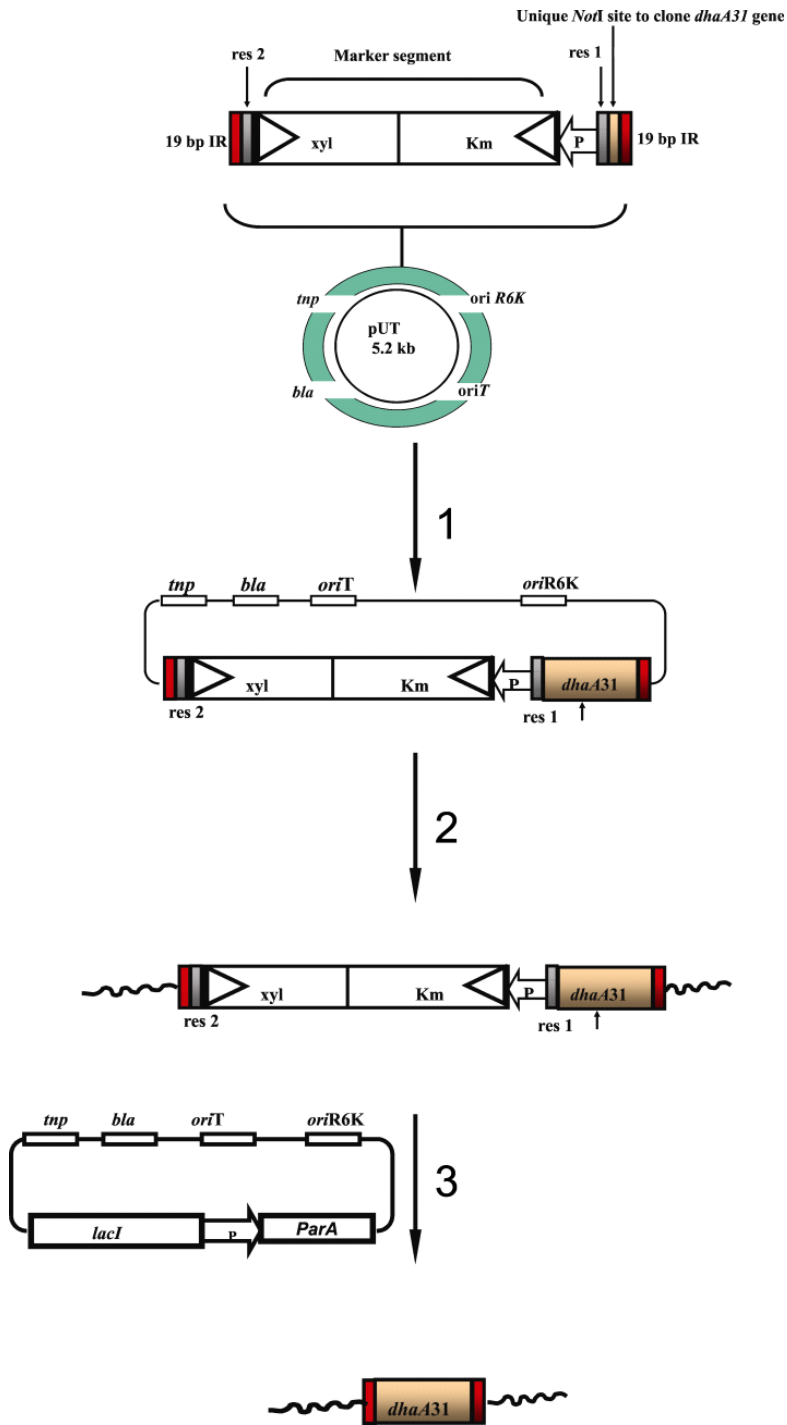

30

31 **Fig S1.** Integration of the *dhaA31* gene into the genome of strain MC4. Steps: 1) Construction of  
32 pUT31B by cloning the *dhaA31* gene with the *dhla* promoter into the unique NotI site, which is  
33 present between the insertion sequences of the pUT delivery vector (1); 2) Introduction of  
34 pUT31B into strain MC4 by triparental mating (1-3). The exconjugants obtained were tested for  
35 kanamycin resistance, yellow coloration with catechol, haloalkane dehalogenase activity and  
36 growth on DCP as sole carbon source; 3) The resolvase gene *parA* on vector pJMSB8 was  
37 introduced into MC4 derivatives by triparental mating to remove kanamycin resistance gene and  
38 the *xylE* marker (4). The resulting colonies were confirmed to have lost the marker segment.  
39  
40  
41

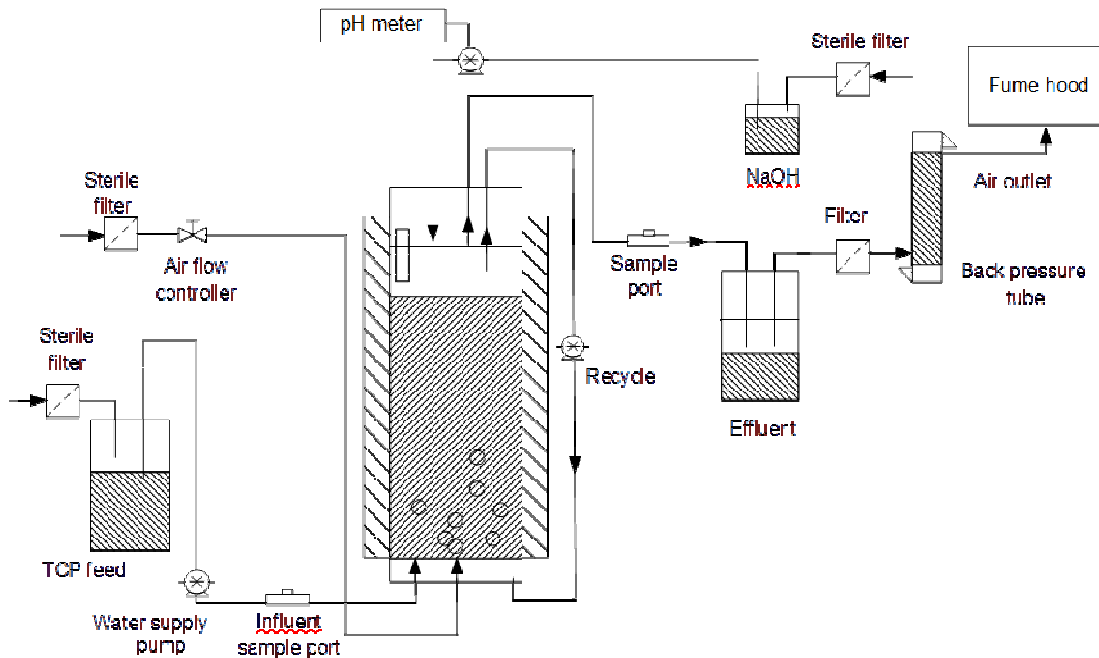

42  
43  
44  
45  
46 **Fig S2.** Process flow diagram of fixed-bed bioreactor.  
47

48

49

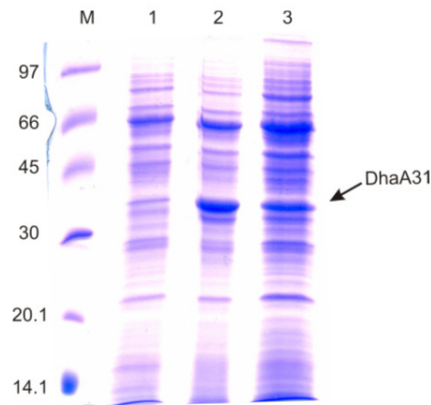

50

51 **Fig. S3.** Haloalkane dehalogenase expression in derivatives of *P. putida* MC4. Slots: M, marker  
52 proteins; 1, cell-free extract of strain MC4; 2, strain MC4(pIS31B); and 3, strain MC4-5222  
53 carrying the chromosomally integrated *dhaA31* gene. All cultures were grown on DCP as carbon  
54 source.

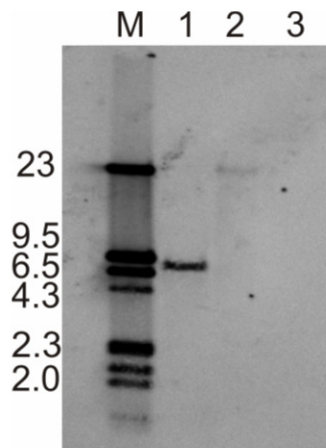

55

56 **Fig. S4.** Detection of chromosomally integrated *dhaA* DNA by Southern hybridization.  
57 Hybridization was performed with a 2-kb fragment (*dhlA* promoter, *dhaA31* gene and terminator)  
58 as a probe with non-radioactive DIG-labeling and SalI digested chromosomal total DNA of strain  
59 MC4-5222 (lane 1); MC4-52 (lane 2); and MC4 (lane 3). M, fragment size markers.

60

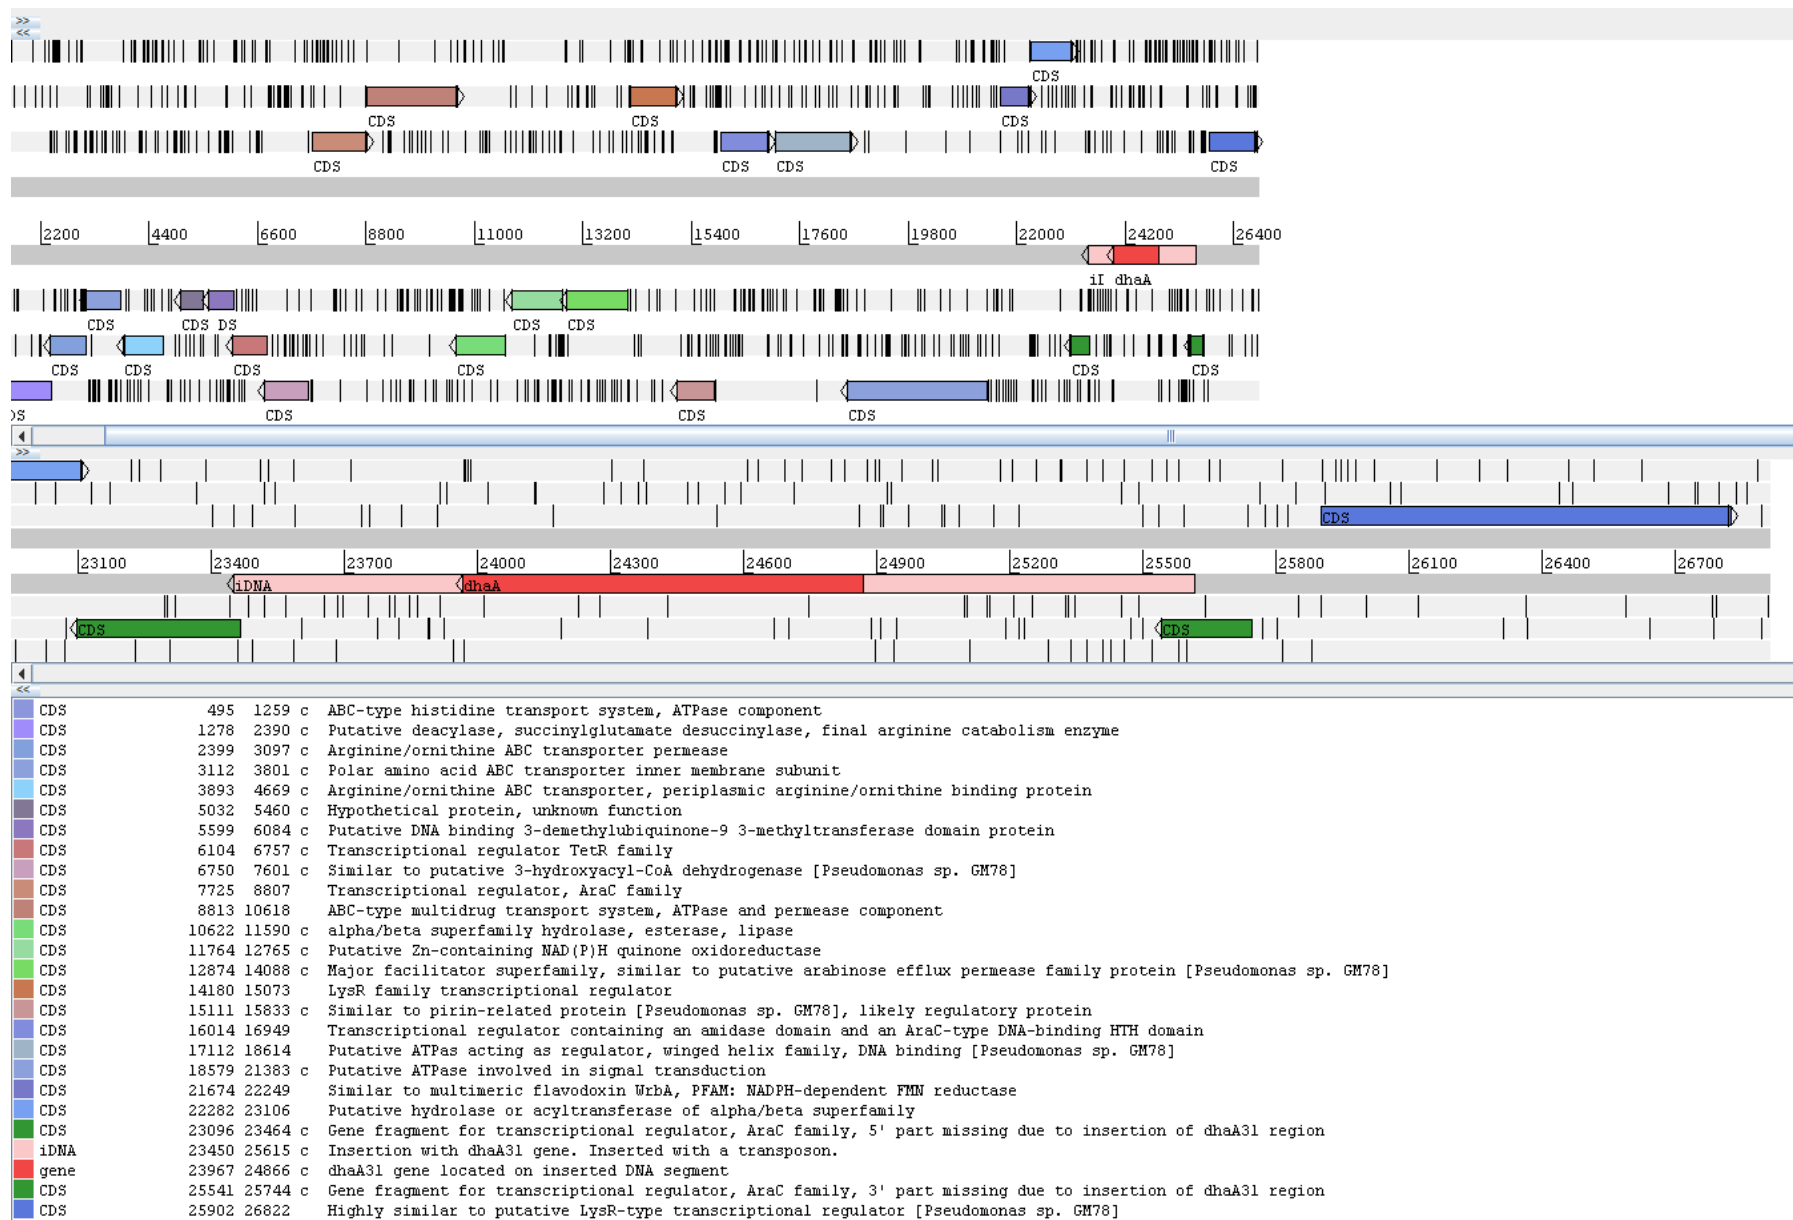

62 **Fig S5.** Artemis display of the 26,912 bp contig (contig 1007) harboring the inserted DNA fragment with the DhaA31-encoding gene on the reverse  
63 complement. The upper part shows the overall organisation of the region. The middle part is a close-up of the region where the insert (dsiplayed in pink) with  
64 the *dhaA31* gene (in red) is located. The insert is positioned in an open reading frame encoding a putative protein similar the transcriptional regulators of the  
65 AraC family. The interrupted open reading frame is shown in green. The lower part shows the annotation of the genes in the 26,912 bp contig, as obtained  
66 with the RAST server and by BLAST searches. The Whole Genome Shotgun project has been deposited at DDBJ/EMBL/GenBank  
67 under accession number JOJW00000000. The version described in this paper is version JOJW01000000.

68

69

## 70 **References**

71

- 72 1. **de Lorenzo V, Timmis KN.** 1994. Analysis and construction of stable phenotypes in Gram-negative bacteria with Tn5-derived and Tn10-  
73 derived minitransposons. *Methods Enzymol.* **235:** 386-405.
- 74 2. **Ditta G, Stanfield S., Corbin D, Helinski DR.** 1980. Broad host range DNA cloning system for Gram-negative bacteria: construction of a gene  
75 bank of *Rhizobium meliloti*. *Proc. Natl. Acad. Sci. USA* **77:**7347-7351.
- 76 3. **Bosma T, Kruizinga E, de Bruin EJ, Poelarends GJ, Janssen DB.** 1999. Utilization of trihalogenated propanes by *Agrobacterium radiobacter*  
77 AD1 through heterologous expression of the haloalkane dehalogenase from *Rhodococcus* sp. strain m15-3. *Appl. Environ. Microbiol.* **65:** 4575-  
78 4581.
- 79 4. **Panke S, Sanchez-Romero JM, de Lorenzo, V.** 1998. Engineering of quasi-natural *Pseudomonas putida* strains for toluene metabolism through  
80 an *ortho*-cleavage degradation pathway. *Appl. Environ. Microbiol.* **64:** 748-751.
